# Supplementary material
Source: MDPI journal article supplement (https://www.mdpi.com/2077-0472/12/10/1731)
Supplement: s1 [file s1]

**Supplementary Table S1.** Polymorphic marker between 02428 and *mp3* screened in this study

| No | Primers | Genomic position(bp) | Forward 5'-3'          | Reverse3'-5'              | Polymorphic marker |
|----|---------|----------------------|------------------------|---------------------------|--------------------|
| 1  | RM3117  | 3785864              | GCCATCTCTCTCTCTCTCTC   | CCTTAGCTCATCAAGCGAGG      | Polymorphism       |
| 2  | RM175   | 3865706              | cttcggcgccgcatcaaggtg  | cgttgagcagcgcgacgttgac    |                    |
| 3  | RM5819  | 4285381              | CACTCCAGAACCCAGTAGTAGC | ACCCAACAACCTGGTAGACGG     | Polymorphism       |
| 4  | RM6483  | 4313896              | CTCTAGCTTGGAGCTCGTGG   | CTCTCTGACTCCTTGTCCCC      |                    |
| 5  | RM4352  | 4313896              | GTTGTTGCACCATAGTCAGA   | ATACATTCATGAAACCTGCC      | Polymorphism       |
| 6  | RM6594  | 4333680              | CTCATGACCTCGTCTCTCCTC  | ACGTGGTAGCACTCCAGCTC      |                    |
| 7  | RM489   | 4333680              | acttgagacgatcggacacc   | tcacccatggatgtgtcag       | Polymorphism       |
| 8  | RM5849  | 4723228              | AGTAATCTTATGTGCAATTC   | ATCTTATGATTTTCTTTCA       |                    |
| 9  | RM4992  | 4723228              | CAGCCTGCTAATTAGTATT    | ACTCGAAATCCTTCTCTATA      | Polymorphism       |
| 10 | RM5480  | 5337569              | AAGAAGAGGATTTCTCGCC    | GTCCAAGATTCGCAACGG        | Polymorphism       |
| 11 | RM5444  | 5591402              | AACGTACCAGTCGCTGGTTC   | CCCGTGATTTCTCCGAC         | Polymorphism       |
| 12 | RM3195  | 5788042              | AATAGACCGGAAGAAAGCCC   | ATATTCGCCGGAGAGAGAGG      |                    |
| 13 | RM3779  | 5958781              | ACGAAGTCCATGGTTCTTGG   | GCATTTGATCTTGTGGGGAG      |                    |
| 14 | RM3467  | 6003496              | ATAATGGCAGGGTTGTCTCG   | CTCGGTGAGCCTCCTACAAC      | Polymorphism       |
| 15 | L3-118  | 6012517              | GAATTGGGAACCTCCGCCTA   | TCATGACACTATCCTGCACCA     | Polymorphism       |
| 16 | L3-119  | 6012674              | TAAGACCCAGCTGCTGCTACC  | TGTGAAAACCTGCAAACATGCG    |                    |
| 17 | L3-120  | 6016243              | CTCGGAGGGTTGATGAGAT    | AGATGCTGGAGAGTCAACGC      | Polymorphism       |
| 18 | L3-121  | 6036861              | TGCATGCTCTCCTTAGGCTT   | CTCGGACACACTTGGGGGTA      |                    |
| 19 | L3-122  | 6036861              | ACAGATCCGTGTGTGCAAGC   | ATCATGCTGGTGTATCTCTGC     |                    |
| 20 | L3-123  | 6037116              | CCCAAGTGTGTCCGAGCTTA   | TGCACCATGGGTGAGTCAAA      |                    |
| 21 | L3-124  | 6037120              | AGTGTGTCCGAGCTTAGTGC   | ATTGTGCACCATGGGTGAGT      |                    |
| 22 | L3-125  | 6037120              | AGTGTGTCCGAGCTTAGTGC   | ATTGTGCACCATGGGTGAGT      |                    |
| 23 | L3-126  | 6037120              | CCTGCAGCCTATGCTAGATATT | ACGTATTGATGTAATAATTTGTCGT |                    |
| 24 | L3-127  | 6037321              | ATACCCCCAAGTGTGTCCGA   | AGCGAAAGTCAACAGGGGAA      |                    |
| 25 | L3-128  | 6037321              | TCGGCAGAGATACACCATGC   | TGCACCATGGGTGAGTCAAA      |                    |
| 26 | L3-129  | 6040504              | GGATCGGATGGACACCACTC   | TGGTGTGTAAGAAGCACGGG      |                    |
| 27 | L3-130  | 6041103              | ACCATGGATCTCATCTCGCT   | GTTGCAATAATGGCGAGGGG      |                    |
| 28 | L3-131  | 6042404              | TCTCCCCAACTGATCACCCC   | TCCTCGCAAGAAGCTACCCA      |                    |
| 29 | L3-132  | 6043090              | TTGCCTGTTTTCCGAGTTGAC  | AGCTTCCAGCTCTAGCACATT     | Polymorphism       |
| 30 | L3-133  | 6043090              | TTGCCTGTTTTCCGAGTTGAC  | AGCTTCCAGCTCTAGCACATT     | Polymorphism       |
| 31 | L3-134  | 6048507              | TACCCCTATAAGACCCAGC    | GAAAACCTGCAAACATGCGT      |                    |
| 32 | L3-135  | 6048599              | CGGAGCTTCTGTTCATGTGTC  | GA CTGCTTCTTGTACGACGAC    | Polymorphism       |
| 33 | L3-126  | 6058181              | CAGAACTGGCTCAAATGCTTGT | CTTTAACGGTGCGTGCAGT       |                    |
| 34 | L3-137  | 6058818              | CCAGAACTGGCTCAAATGCTTG | TCTTTAACGGTGCGTGCAGTA     |                    |
| 35 | L3-138  | 6061085              | CCTCAGATCGACGAGTGTTT   | TCTCCAGCTCATCATGGTACG     |                    |
| 36 | L3-139  | 6061085              | CCTCAGATCGACGAGTGTTT   | TCTCCAGCTCATCATGGTACG     |                    |
| 37 | L3-140  | 6067340              | AGTGGGGTCAAACCGTCATC   | GCCGAAACGAAGGAGAACT       |                    |
| 38 | L3-141  | 6067340              | GCCGAAACGAAGGAGAACT    | AGTGGGGTCAAACCGTCATC      |                    |
| 39 | RM7576  | 6078216              | CTGCCCTGCCTTTTGTACAC   | GCGAGCATTTCTTTCTCCAC      | Polymorphism       |
| 40 | L3-94   | 6124355              | CCCCTTTGGCAAACGCATAA   | TGAAACAGAAGATTGAATCCTACC  | Polymorphism       |
| 41 | L3-71   | 6127102              | CAGTAGCACGCGATTCCAGT   | CAGTTGCGGAACCTCGTCCTT     |                    |
| 42 | L3-95   | 6127475              | TCGAGGAATGATTTCACTTCCC | TGCAGCTAGAGAATGGTCGAT     | Polymorphism       |
| 43 | L3-72   | 6164430              | AGCGTGACGTCCTTCCAGTC   | CCGACGCCGTGTCTAGG         |                    |
| 44 | L3-73   | 6227774              | TAGGAGCACGTCCAGCTATTT  | GCCGTTGAGAGCCTAACC        |                    |
| 45 | L3-74   | 6227953              | CACGCCTTTCCCCGTACAA    | ACCCCTTCCGGCGGT           |                    |
| 46 | L3-96   | 6239662              | GGTCTAACGGCCAGTCACTC   | ACGATTCCGACGACAAGGAG      |                    |

|     |        |         |                         |                         |              |
|-----|--------|---------|-------------------------|-------------------------|--------------|
| 47  | L3-97  | 6239662 | TAACGGCCAGTCACTCTCCA    | CGATTCCGACGACAAGGAGT    | Polymorphism |
| 48  | L3-98  | 6239927 | CGGCCAGTCACTCTCCAAAT    | CACGATTCCGACGACAAGGA    | Polymorphism |
| 49  | L3-99  | 6240243 | TGACATGCACGAAACGAGAGT   | GTCGGTGATGGTGTCTAGG     | Polymorphism |
| 50  | L3-100 | 6240244 | GCACGATTGATCACAGCTCG    | TGCATGAAACCGACACCGAT    |              |
| 51  | L3-101 | 6240244 | GCACGATTGATCACAGCTCG    | TGCATGAAACCGACACCGAT    | Polymorphism |
| 52  | L3-102 | 6240278 | TTCTTTTCGTGACGCTTGAC    | ACTTGGACTGCATACGGCTG    |              |
| 53  | L3-103 | 6240278 | ATCACAGCTCGATCCTTGGG    | ACTTGGACTGCATACGGCTG    |              |
| 54  | L3-75  | 6259697 | AAGTCTTGTCCAAATTGCCCG   | TTGGTGCCTACGTGAATGGA    |              |
| 55  | L3-76  | 6263525 | CTGGAGCACTCTACTTTGACCA  | TTGCACGTTTCATATGGCTTGT  |              |
| 56  | L3-77  | 6264597 | GAGCCCTGAAAACATGAACCC   | TGGTCGTCGACTTTTGCTCG    |              |
| 57  | L3-78  | 6282747 | GAGGTGAGGCTCCGAGGTAG    | ACCTCGCTCGATCACGAAC     |              |
| 58  | L3-79  | 6300751 | TAACTCCCCGCTCCCTTTCA    | GGCGTTAAATGCGTTTGGCT    |              |
| 59  | L3-80  | 6300751 | TAACTCCCCGCTCCCTTTCA    | GGCGTTAAATGCGTTTGGCT    |              |
| 60  | L3-81  | 6300963 | ATGCAGCTTTCTGGCCAATC    | TCCAAACCTGGACATCGACAG   |              |
| 61  | L3-104 | 6324800 | TGCAGGTATTGGCTGTCCTTC   | ACGAAGCACCGTTATCGTCT    |              |
| 62  | L3-82  | 6388455 | GACCAGCAAGTCGAGGTAGC    | CCCCAATCATACTAGCGCGG    |              |
| 63  | L3-83  | 6417306 | CACCCCTCTTGTGACCCCTC    | CATCACTTAGTCTCTCTCTCTCA |              |
| 64  | L3-105 | 6428615 | ACGAGATCCGGGAGAAGAAGA   | CGCCGCCGTATATGAGATCG    |              |
| 65  | L3-106 | 6428615 | CCTACAGTTGATACGGGAGACA  | ACGTAGTTGCTTCCCCCATT    |              |
| 66  | L3-107 | 6428615 | ACAGTTGATACGGGAGACATCA  | ATACGTAGTTGCTTCCCCCA    |              |
| 67  | L3-84  | 6428617 | GACGTCGAGAAGTACGTGCG    | GAGATCGTAGCACTCCGGC     |              |
| 68  | L3-108 | 6428617 | AGAAGAGCGCCTGCTACAC     | ACATCTCACTCTCACGCCG     |              |
| 69  | L3-85  | 6469138 | TTTCCGAATGGGACGGAGT     | GCAACCTGTCTGGTAGAGAA    |              |
| 70  | L3-86  | 6469139 | GACCTACAGTTGATACGGGAGAC | ATACGTAGTTGCTTCCCCCA    |              |
| 71  | L3-87  | 6512933 | GGTTGGATCTGCTTGCCCTTG   | AGCATCCTCTTGAGCACGG     | Polymorphism |
| 72  | L3-88  | 6535503 | AGGGCACGTTGAGACTGAAG    | CACCTTCTACCCAGCTAGCAATC | Polymorphism |
| 73  | L3-109 | 6537734 | TGAGAATTGAGATATGGTGGGGG | CAGCGATGGATCGCCATTG     |              |
| 74  | L3-110 | 6537923 | GAGGCTAGGGTTTCTGCGTC    | GGGTCGAGACCATGTGCGTA    | Polymorphism |
| 75  | RM3864 | 6543081 | AGTCAACCTTGGGGGTAAGG    | AGATACTGCCCCGTGTCATCC   | Polymorphism |
| 76  | RM3206 | 6552729 | GCGCCTCTCTTCTTCCTCTC    | GAAAATCGAATCACGGGCGAC   | Polymorphism |
| 77  | RM5477 | 6552729 | CACGCATTGTTCTGTGATAGG   | GCTAATACCGAGCGAGATGG    | Polymorphism |
| 78  | L3-111 | 6553617 | AGGGGGCTAAACGAGCAATC    | CCGTCTCGAGTCTTACCTC     | Polymorphism |
| 79  | L3-112 | 6553723 | TGATGTACAACGGGCCAACC    | TCAACTGACAAGTTGCGCCT    |              |
| 80  | L3-89  | 6553866 | AATGACGCACGCATTGTTCG    | TTCAACTGACAAGTTGCGCC    |              |
| 81  | L3-90  | 6561432 | GCAACAGTAACCAAGGAACCC   | ACCCCATACAGTGAACCTAAGTC |              |
| 82  | L3-91  | 6561581 | GCTAAACGAGCAATCGGTGC    | CCTCCGTCCTCGAGTCTTAC    |              |
| 83  | L3-113 | 6561581 | GCTAAACGAGCAATCGGTGC    | CCTCCGTCCTCGAGTCTTAC    |              |
| 84  | L3-114 | 6577494 | CGTGGCCCATCGTGCATTTT    | TGCCACTGTCCAAAGAATAAGGA |              |
| 85  | L3-115 | 6583326 | AGGTTATGCAGGTATTGGCTGT  | AAGCACCGTTATCGTCTGCC    |              |
| 86  | L3-92  | 6636543 | CTTCTCGTCTCATCCCGTCG    | CCGAGACCATGTGCTACACC    |              |
| 87  | L3-93  | 6636618 | CCTTTAAAGAGGGCGTCCCA    | GCCGTCCTCGCCAGGA        |              |
| 88  | RM5755 | 6707871 | GGAATCGTTGCTCTCGTTTC    | CAGACACCGGCCTTAATCAC    | Polymorphism |
| 89  | L3-116 | 6714200 | AGATCGTCAGACCTCTCGAA    | CCGTACGTTGAAGTAGCTGA    |              |
| 90  | L3-117 | 6714204 | CAAAGATCGTCAGACCTCTCG   | CCGTACGTTGAAGTAGCTGAA   |              |
| 91  | RM7565 | 6807113 | TGATTCTCTGCGACCGATC     | CATGCATGCTCTCCTTAGGC    | Polymorphism |
| 92  | L3-51  | 6812447 | GTGGCAGCCCACTACAAGTC    | TCACGCAACGAGGTTACGAT    |              |
| 93  | L3-52  | 6812449 | GGCAGCCCACTACAAGTCTA    | ACGAACGGGAAGTGCAAGAA    |              |
| 94  | L3-53  | 6812449 | GGCAGCCCACTACAAGTCTA    | ACGAACGGGAAGTGCAAGAA    |              |
| 95  | L3-54  | 6812449 | GTGGCAGCCCACTACAAGTC    | TCACGCAACGAGGTTACGAT    |              |
| 96  | RM3716 | 6839264 | GTCGTTTCGTTGACTCGTTG    | CACACATATATACCCCCCCC    | Polymorphism |
| 97  | L3-55  | 6840297 | AGTCTCATGCTTTTCTGCACG   | GGCGTCAGATGCACATTCTC    |              |
| 98  | L3-56  | 6840310 | TCTGCACGTACGATCGTCTTTT  | CGTGCATCTGAAGCCATCAAG   |              |
| 99  | L3-57  | 6840559 | ATCCTCCCAAGCTTGACTTGT   | TTGGCGTCAGATGCACATTC    |              |
| 100 | L3-58  | 6840563 | TCCTCCCAAGCTTGACTTGT    | GAGTTTGGCGTCAGATGCAC    |              |
| 101 | L3-59  | 6840619 | TGCACGTACGATCGTCTTTT    | GTCGTGCATCTGAAGCCATC    |              |
| 102 | RM387  | 6851987 | GGAAGAAAGGATCTATATCA    | TACGATTTGTTTAAAGTTCAA   | Polymorphism |

|     |            |         |                        |                         |              |
|-----|------------|---------|------------------------|-------------------------|--------------|
|     | 2          |         |                        |                         |              |
| 103 | L3-60      | 6852926 | ATAGAGCAGGGCTGGAACAC   | TGCTTGCCTTAGTGTCCGTA    |              |
| 104 | L3-61      | 6852930 | AGCAGGGCTGGAACACATTT   | ATGCTTGCCTTAGTGTCCGT    |              |
| 105 | L3-62      | 6852981 | ATCCGGGGCTCACAAATTA    | GCTTGCCTTAGTGTCCGTAG    |              |
| 106 | L3-63      | 6854060 | TCGACCACGCTGGTTGATTAG  | TTAGGCGTCGACACGAAGG     | Polymorphism |
| 107 | L3-64      | 6854288 | TCGACCACGCTGGTTGATT    | GTTAGGCGTCGACACGAAGG    | Polymorphism |
| 108 | L3-65      | 6856728 | TGGTGATTGGGTTGCCCTG    | GGGGAATTTTCAGACAGCCG    |              |
| 109 | L3-66      | 6856929 | ATCAGGTTCAGGTCAGGTCG   | GGGGCAAGAGATAGGGGAA     | Polymorphism |
| 110 | L3-16      | 6871001 | TCCTCCTTCCGTTAGGGCAT   | GGAAGTTCTGAGCGAGCGAT    | Polymorphism |
| 111 | L3-67      | 6871001 | TCCTCCTTCCGTTAGGGCAT   | GGAAGTTCTGAGCGAGCGAT    | Polymorphism |
| 112 | L3-17      | 6871060 | CTGTTCTGGTCGGTCGAGAG   | TGAACGGTCGATGACAGGTG    |              |
| 113 | L3-68      | 6871060 | CTGTTCTGGTCGGTCGAGAG   | TGAACGGTCGATGACAGGTG    |              |
| 114 | L3-35      | 6871261 | TCCAAAACAGAGTAGCGCGT   | TGAACGGTCGATGACAGGTG    | Polymorphism |
| 115 | L3-36      | 6871261 | CTGTTCTGGTCGGTCGAGAG   | GAGCCTTCAATGTGCGTTGG    | Polymorphism |
| 116 | L3-69      | 6871270 | TTCGAGTGTTTCGTCCAGGG   | TCCGGTTTGAACGGTCGAT     | Polymorphism |
| 117 | L3-70      | 6934496 | ATATGGGAGGCATGCCAAGA   | TATAGAGCCAACACAACGGC    |              |
| 118 | L3-37      | 6957212 | ATCTCTACGTCTCCGGGAT    | CACGGGAATACCTTTCCCCA    | Polymorphism |
| 119 | L3-38      | 6973794 | CAAACAACACCTCGTGCCTT   | GGCAAATGCATGGCTGGAAT    |              |
| 120 | L3-39      | 6987563 | TATGCTGCCCAAGTTAATCGC  | GCCTTTTGTGCTATGGCAACTT  |              |
| 121 | L3-40      | 6987564 | TGCTGCCCAAGTTAATCGCA   | GCCTTTTGTGCTATGGCAACT   |              |
| 122 | L3-41      | 6996952 | AGAGGAAGTTGCAGGTCGTG   | GTTAGGCTTCTCGCTCTCCC    |              |
| 123 | L3-42      | 7027054 | TAAATGGCCGCTGCGTACAA   | ATCGAGCTGTCCCTCACTCA    |              |
| 124 | L3-43      | 7040253 | GAGGCCTCTGTCTGACCC     | CGATCAAACGCTTGGTGAGG    |              |
| 125 | L3-44      | 7050657 | GTACTCTGTGCCGCATGTA    | ACGGCATAACACCATTTGTCG   |              |
| 126 | L3-45      | 7050842 | GATGTACTCGTTGTCCCGCA   | GGCATAACACCATTTGTCGCC   | Polymorphism |
| 127 | L3-46      | 7051206 | GTTTGGTGCCGTA CTGTCGT  | CGTGATGAATCGCTCGCAC     | Polymorphism |
| 128 | L3-47      | 7051320 | GGGTTTGGTGCCGTA CTGT   | CGAATCCGTGATGAATCGCTC   |              |
| 129 | L3-48      | 7051323 | GGGTTTGGTGCCGTA CTGTC  | CGTCGAATCCGTGATGAATCG   |              |
| 130 | L3-49      | 7051366 | TTTGGTGCCGTA CTGTCGTG  | AAACCGTCACGCTTCCTAGA    |              |
| 131 | L3-50      | 7051366 | GTTTGGTGCCGTA CTGTCGT  | GAAACCGTCACGCTTCCTAGA   |              |
| 132 | L3-18      | 7105849 | TTTGCTGACTAGGCGGATGC   | AGTCAGTCCGAGGTCCCTAAT   | Polymorphism |
| 133 | L3-19      | 7105859 | CTCCAAGGTCGGGATCTTCC   | CTTCACGTTGAGTCAGTCCGA   |              |
| 134 | L3-20      | 7127158 | CGCCGCACGATCCGGT       | ATCGCGTGTGCGTGTCTAT     | Polymorphism |
| 135 | L3-21      | 7127158 | CCGCACGATCCGGTG        | TTAATTGATCGCGTGTGCGT    | Polymorphism |
| 136 | L3-22      | 7127163 | GCCGCACGATCCGGTG       | TAATTGATCGCGTGTGCGTG    | Polymorphism |
| 137 | L3-23      | 7143188 | TGTTGCTACCCTAGCTTTGAT  | TCGCCTCTTTATGGTAGCTGG   | Polymorphism |
| 138 | L3-1       | 7180481 | ATCACGGTCCAATTACACACC  | CCGTGTGCTGTCTGTTACTTG   | Polymorphism |
| 139 | L3-24      | 7180481 | ATCACGGTCCAATTACACACC  | CCGTGTGCTGTCTGTTACTTG   |              |
| 140 | L3-25      | 7180481 | ATCACGGTCCAATTACACACCA | GTGCTGTCTGTTACTTGATTCGG |              |
| 141 | L3-2       | 7180483 | CACGGTCCAATTACACACCAG  | CAGACAAATCGCCGTGTC      |              |
| 142 | L3-3       | 7180483 | ATCACGGTCCAATTACACACCA | GCAGACAAATCGCCGTGTG     | Polymorphism |
| 143 | L3-26      | 7180795 | CACGGTCCAATTACACACCAG  | CGTGTGCTGTCTGTTACTTGAT  | Polymorphism |
| 144 | L3-27      | 7180796 | ACGGTCCAATTACACACCAGA  | CCGTGTGCTGTCTGTTACTTGA  | Polymorphism |
| 145 | L3-28      | 7180807 | CAGCACACGGCGATTTGTC    | TGGGTCTAGAGGAAGCGACT    | Polymorphism |
| 146 | L3-29      | 7211315 | GCTCCTGACGTCAAAATGCAG  | ACTTGGTAGGATGCACGGTT    | Polymorphism |
| 147 | L3-30      | 7211447 | TCCATCAACCGTGCATCCTA   | CTGATCAGGATCGGGTTGCG    | Polymorphism |
| 148 | L3-31      | 7211454 | ACCGTGCATCCTACCAAGTT   | TGGTCACGATGACGTAGCTG    |              |
| 149 | RM551<br>3 | 7232837 | GCTTTCTGGCCAATCTGATG   | CCAAACCTGGACATCGACAG    |              |
| 150 | L3-4       | 7241879 | GACAGGAGTTTGGCAGCTAGA  | TCACTAACAGTTGGGGCGTT    | Polymorphism |
| 151 | L3-32      | 7241879 | GACAGGAGTTTGGCAGCTAGA  | TCACTAACAGTTGGGGCGTT    | Polymorphism |
| 152 | L3-5       | 7328828 | ACATGGTCGGAGTTGTGGAA   | GGGCCTTGTAATCGAGAGGC    |              |
| 153 | L3-6       | 7402543 | GGTGCCGTTTGTTCCTTGG    | GGATGCTCAATCGATGCCGA    |              |
| 154 | L3-7       | 7487037 | CAAGAGACCAGAGCGGCAAA   | TTTAGCGCGGCATCTGCAT     |              |
| 155 | L3-8       | 7632934 | ATCGGGAGGGCAGAATGATG   | GAATAAGCCGGAGAGCACGA    |              |
| 156 | L3-9       | 8438806 | TAGCAAGAGCTGTCTCCATTG  | TCTCGTGTGATACTGGGCAT    |              |
| 157 | L3-10      | 8445268 | CTCAGATGCCGCTACTCGG    | TTTGTCACGTTGCCGTGAGA    | Polymorphism |
| 158 | L3-11      | 8456048 | AGATACGAGATTACGCCCGC   | CAATTTTAGCGCGGGACGAG    | Polymorphism |
| 159 | L3-12      | 8593372 | CTCAAATTGTGCAATGCACGGA | GTACCCTACCATGTTGGTTTGT  | Polymorphism |
| 160 | L3-13      | 9013252 | TATCTCGCAGGACAAGCGTC   | CGTCGCCTGATCTCCTCATT    |              |
| 161 | L3-14      | 9083162 | TCTTGTAGGCTAAGTGTGCGT  | ATGACCACTTGTGGCACGAT    |              |
| 162 | L3-15      | 9229810 | GCCCATAGAGGTTGTCTCAC   | GCAAGCAACGAGAAGACCG     |              |
| 163 | RM719<br>7 | 9888524 | AACGTGGGAATTTCTAGCCC   | GTTTTGGGCCTAAACGAGTG    | Polymorphism |



|    |   |   |   |   |   |   |   |   |   |   |
|----|---|---|---|---|---|---|---|---|---|---|
| 47 | 1 | 1 | 1 | 1 | 1 | 1 | 1 | 1 | 1 | H |
| 48 | H | H | H | H | 1 | 1 | 1 | 1 | 1 | 1 |
| 49 | 1 | 1 | 1 | 1 | 1 | 1 | 1 | 1 | 1 | H |
| 50 | 1 | 1 | 1 | 1 | 1 | 1 | 1 | 1 | 1 | H |
| 51 | 1 | 1 | 1 | 1 | 1 | 1 | 1 | 1 | H | H |
| 52 | 1 | 1 | 1 | 1 | 1 | 1 | 1 | 1 | 1 | H |
| 53 | 1 | 1 | 1 | 1 | 1 | 1 | 1 | 1 | 1 | H |
| 54 | 1 | 1 | 1 | 1 | 1 | 1 | 1 | 1 | 1 | H |
| 55 | 1 | 1 | 1 | 1 | 1 | 1 | 1 | 1 | H | H |
| 56 | 1 | 1 | 1 | 1 | 1 | 1 | 1 | 1 | 1 | H |
| 57 | 1 | 1 | 1 | 1 | 1 | 1 | 1 | 1 | 1 | H |
| 58 | 1 | 1 | 1 | 1 | 1 | 1 | 1 | 1 | 1 | H |
| 59 | 1 | 1 | 1 | 1 | 1 | 1 | 1 | 1 | H | H |
| 60 | 1 | 1 | 1 | 1 | 1 | 1 | 1 | 1 | 1 | H |
| 61 | 1 | 1 | 1 | 1 | 1 | 1 | 1 | 1 | 1 | H |

**H:** Exchange of recombinant plants for *mp3*. **GP:** Genomic position (bp) with reference to the genome sequence of Nippobare
